# Supplementary material
Source: PubMed Central journal article supplement (PMC1794061)
Supplement: blood_blood-2006-08-038901_2.pdf [file blood_blood-2006-08-038901_2.pdf]

| <b>Enrichment<br/>(fold)</b> | <b>Gene Ontology term</b>                   | <b>Cluster size</b> | <b>Probe sets<br/>within cluster</b> | <b>No. of genes<br/>in pathway</b> | <b>P-value</b> |
|------------------------------|---------------------------------------------|---------------------|--------------------------------------|------------------------------------|----------------|
| 8.8137                       | chemokine activity                          | 414                 | 10                                   | 45                                 | 0.000          |
| 8.8137                       | chemokine receptor binding                  | 414                 | 10                                   | 45                                 | 0.000          |
| 8.5755                       | complement activity                         | 414                 | 8                                    | 37                                 | 0.000          |
| 8.4387                       | G-protein-coupled receptor binding          | 414                 | 10                                   | 47                                 | 0.000          |
| 8.3013                       | complement activation                       | 414                 | 9                                    | 43                                 | 0.000          |
| 8.2629                       | chemoattractant activity                    | 414                 | 10                                   | 48                                 | 0.000          |
| 7.4366                       | humoral defense mechanism                   | 414                 | 9                                    | 48                                 | 0.000          |
| 6.6962                       | chemotaxis                                  | 414                 | 13                                   | 77                                 | 0.000          |
| 6.5643                       | phospholipid binding                        | 379                 | 5                                    | 33                                 | 0.001          |
| 6.2366                       | actin cytoskeleton                          | 95                  | 7                                    | 194                                | 0.000          |
| 5.9071                       | lipid transporter activity                  | 414                 | 7                                    | 47                                 | 0.000          |
| 5.8042                       | lysosome                                    | 414                 | 18                                   | 123                                | 0.000          |
| 5.8042                       | lytic vacuole                               | 414                 | 18                                   | 123                                | 0.000          |
| 5.6660                       | aminopeptidase activity                     | 414                 | 7                                    | 49                                 | 0.000          |
| 5.5342                       | hormone metabolism                          | 414                 | 6                                    | 43                                 | 0.001          |
| 5.4817                       | response to chemical substance              | 414                 | 17                                   | 123                                | 0.000          |
| 5.3391                       | peroxidase activity                         | 414                 | 7                                    | 52                                 | 0.000          |
| 5.2384                       | oxidoreductase activity/peroxidase acceptor | 414                 | 7                                    | 53                                 | 0.000          |
| 5.2110                       | vacuole                                     | 414                 | 18                                   | 137                                | 0.000          |
| 4.6254                       | serine protease inhibitor activity          | 284                 | 8                                    | 100                                | 0.000          |
| 4.5264                       | antioxidant activity                        | 379                 | 7                                    | 67                                 | 0.001          |
| 4.4069                       | endopeptidase inhibitor activity            | 414                 | 16                                   | 144                                | 0.000          |
| 4.4069                       | protease inhibitor activity                 | 414                 | 16                                   | 144                                | 0.000          |
| 4.1649                       | cytoskeleton organization and biogenesis    | 95                  | 10                                   | 415                                | 0.000          |
| 3.8210                       | immune response                             | 414                 | 50                                   | 519                                | 0.000          |
| 3.7135                       | inflammatory response                       | 379                 | 9                                    | 105                                | 0.001          |
| 3.7135                       | innate immune response                      | 379                 | 9                                    | 105                                | 0.001          |
| 3.6056                       | exopeptidase activity                       | 414                 | 9                                    | 99                                 | 0.001          |
| 3.5269                       | defense response                            | 414                 | 57                                   | 641                                | 0.000          |
| 3.5168                       | enzyme inhibitor activity                   | 414                 | 18                                   | 203                                | 0.000          |
| 3.3824                       | organelle organization and biogenesis       | 95                  | 10                                   | 511                                | 0.001          |
| 3.3003                       | response to biotic stimulus                 | 414                 | 57                                   | 685                                | 0.000          |
| 3.1729                       | cysteine-type peptidase activity            | 414                 | 14                                   | 175                                | 0.000          |
| 3.1519                       | cysteine-type endopeptidase activity        | 414                 | 12                                   | 151                                | 0.000          |
| 3.1312                       | lipid binding                               | 414                 | 12                                   | 152                                | 0.000          |
| 2.9985                       | actin binding                               | 414                 | 22                                   | 291                                | 0.000          |
| 2.6954                       | cytoskeleton                                | 95                  | 16                                   | 1026                               | 0.000          |
| 2.6708                       | response to pest/pathogen/parasite          | 414                 | 20                                   | 297                                | 0.000          |
| 2.6093                       | cytokine activity                           | 414                 | 15                                   | 228                                | 0.001          |
| 2.4924                       | cytoskeletal protein binding                | 414                 | 23                                   | 366                                | 0.000          |
| 2.3791                       | response to abiotic stimulus                | 379                 | 19                                   | 346                                | 0.000          |
