# Supplementary material
Source: PubMed Central journal article supplement (PMC1794061)
Supplement: blood_blood-2006-08-038901_3.pdf [file blood_blood-2006-08-038901_3.pdf]

| <b>Enrichment<br/>(fold)</b> | <b>Gene Ontology term</b>           | <b>Cluster size</b> | <b>Probe sets<br/>within cluster</b> | <b>No. of genes<br/>in pathway</b> | <b>P-value</b> |
|------------------------------|-------------------------------------|---------------------|--------------------------------------|------------------------------------|----------------|
| 18.63                        | transferase activity                | 235                 | 4                                    | 15                                 | 0.000          |
| 10.48                        | blood coagulation                   | 235                 | 6                                    | 40                                 | 0.000          |
| 9.41                         | hemostasis                          | 235                 | 7                                    | 52                                 | 0.000          |
| 9.32                         | cell cycle arrest                   | 235                 | 4                                    | 30                                 | 0.001          |
| 9.00                         | growth factor activity              | 38                  | 4                                    | 192                                | 0.001          |
| 6.72                         | metal ion homeostasis               | 235                 | 5                                    | 52                                 | 0.001          |
| 5.83                         | immune response                     | 38                  | 7                                    | 519                                | 0.000          |
| 5.44                         | receptor binding                    | 38                  | 6                                    | 477                                | 0.001          |
| 4.72                         | defense response                    | 38                  | 7                                    | 641                                | 0.001          |
| 4.62                         | receptor signaling protein activity | 196                 | 7                                    | 127                                | 0.001          |
| 4.42                         | response to biotic stimulus         | 38                  | 7                                    | 685                                | 0.001          |
| 3.95                         | ligase activity                     | 234                 | 8                                    | 142                                | 0.001          |
| 2.62                         | calcium ion binding                 | 158                 | 15                                   | 596                                | 0.001          |
| 2.27                         | Plasma membrane                     | 235                 | 48                                   | 1479                               | 0.000          |
