# Supplementary material
Source: PubMed Central journal article supplement (PMC1794061)
Supplement: blood_blood-2006-08-038901_4.pdf [file blood_blood-2006-08-038901_4.pdf]

| <b>Gene symbol</b> | <b>Forward primer (5' - 3')</b> | <b>Reverse primer (5' - 3')</b> |
|--------------------|---------------------------------|---------------------------------|
| Mcm7               | TTACATTGAACACCGGCTGA            | GGCCTCGGAAATACAACCTCA           |
| Myc                | GCTGGAGATGATGACCGAGT            | AACCGCTCCACATACAGTCC            |
| Hmga2              | TCTCTCCCTCCCTTCTCTCC            | TAACACGCAGGCTTCATCTG            |
| Gas6               | GCCTCGTACAAGCACAGTGA            | GTGTCCAAACCCTGCTTCAT            |
| Anxa6              | CGAGCTGGATATGCTTGACA            | ACAGCTTCAGCAGAGCCTTC            |
| Afp                | AGTGCGTGACGGAGAAGAAT            | TTCTTCATTGCAGCCAACAC            |
| Aif1               | GACGAACCCTCTGATGTGGT            | TGAGGAGGACTGGCTGACTT            |
| Alb1               | TTGCATGAAGTTGCCAGAAG            | GTCAGGCAGCTTTCCTTGTC            |
| Lpl                | CTTTCACTCGGATCCTCTCG            | AGGTGGACATCGGAGAACTG            |
| Nrp1               | CGGACGTTTTTCACCTCTCTC           | GTCCAGCTGTAGGTGCTTCC            |
| Ttr                | GCTTCCCTTCGACTCTTCCT            | GCATCCAGGACTTTGACCAT            |
| H19                | CCAGCCTTCTTGAACACCAT            | GTTCAAGGTAGGGGGAGGAG            |
| Prg2               | TCCTAGTCAGGAGGGCTGAA            | CGGACTGGATTCCGAAGTTA            |
| Nqo1               | TCGGGCTAGTCCCAGTTAGA            | AAGTTAGTCCCTCGGCCATT            |
| Npn3               | AGCTAGCCACCATTGTCACC            | ATGGTACTGCAGGCAACACA            |
| Tesc               | GGGAAACCCTCACATTGAAA            | GTGATCCCCTCGTACACCTG            |
| Lipin1             | GAATGGAAAGCCAGCTGAAG            | TCTTCTTCCCAGAGAACCA             |
| p45 NF-E2          | TGGCCATGAAGATTCTTTTC            | GACGGATGTCCCGAACTAGA            |
| Tubb1              | GGAATGGATTCCCAACAATG            | CAGAGACCCTGGTGAAGAGC            |
| Rab27b             | CCAGACCAAAGGGAAGTCAA            | CCAGAAGCGTTTCCACTGAC            |
| Vm                 | TGCAGGAAGAAATTGCCTTT            | AGTGAGGTCAGGCTTGAAA             |
| Gbp2               | TTTGTGGGCTTCTTTCCAAC            | TTTTTCAGGGTCAGGGAATG            |
| Krt2-8             | AGCTGAGGCTGAAACCATGT            | TTGATGTTGCGGTTTCATCTC           |
| Lrpap1             | GTGCTGATGGCTCTGATGAA            | CATTCTCCCCATCACATTCC            |
| Srxn1              | CCAGGGTGGCGACTACTACT            | TCAGGTCTGAAAGGGTGGAC            |
| Lims1              | TCAAGAATGCTGGCAGACAC            | TGAAGGTCAGAGGCTGTTCA            |
| Dhrs3              | CAAAGCTGTCCGAGAGAAGG            | TTGACATGCTGGGACTTGAG            |
| GAPDH              | CAAGGTCATCCCTGACAACCTTG         | GGCCATCCACAGTCTTCTGG            |
| LIM-495            | GAGCAGATGGGAACCCTGTA            | AGCAGGCAGAGAGGCTTATG            |
| LIM-down           | CTCTGTGTAGCCCTGGCTGT            | CTGGCTTCTGAGGGCAATAC            |
| Apo1a              | GTGGGCTCCATGAGACTATCTT          | CAGCTCTTCTCCCTGGTCTAT           |
| HistH4a            | CATGGTTGATGGGAGGGATTG           | AATGGAGTCAGAGCTGAGAGTC          |
